# Supplementary material
Source: publisher figshare collection journal article supplement (https://frontiersin.figshare.com/ndownloader/files/13805954)
Supplement: Supplementary file 1 [file 13805954]

Supplementary Material

Elevated temperature does not substantially modify the interactive effects between elevated CO2 and diel CO2 cycles on the survival, growth and behaviour of a coral reef fish

Michael D. Jarrold* and Philip L. Munday

*** Correspondence:** [michael.jarrold@my.jcu.edu.au](mailto:michael.jarrold@my.jcu.edu.au)


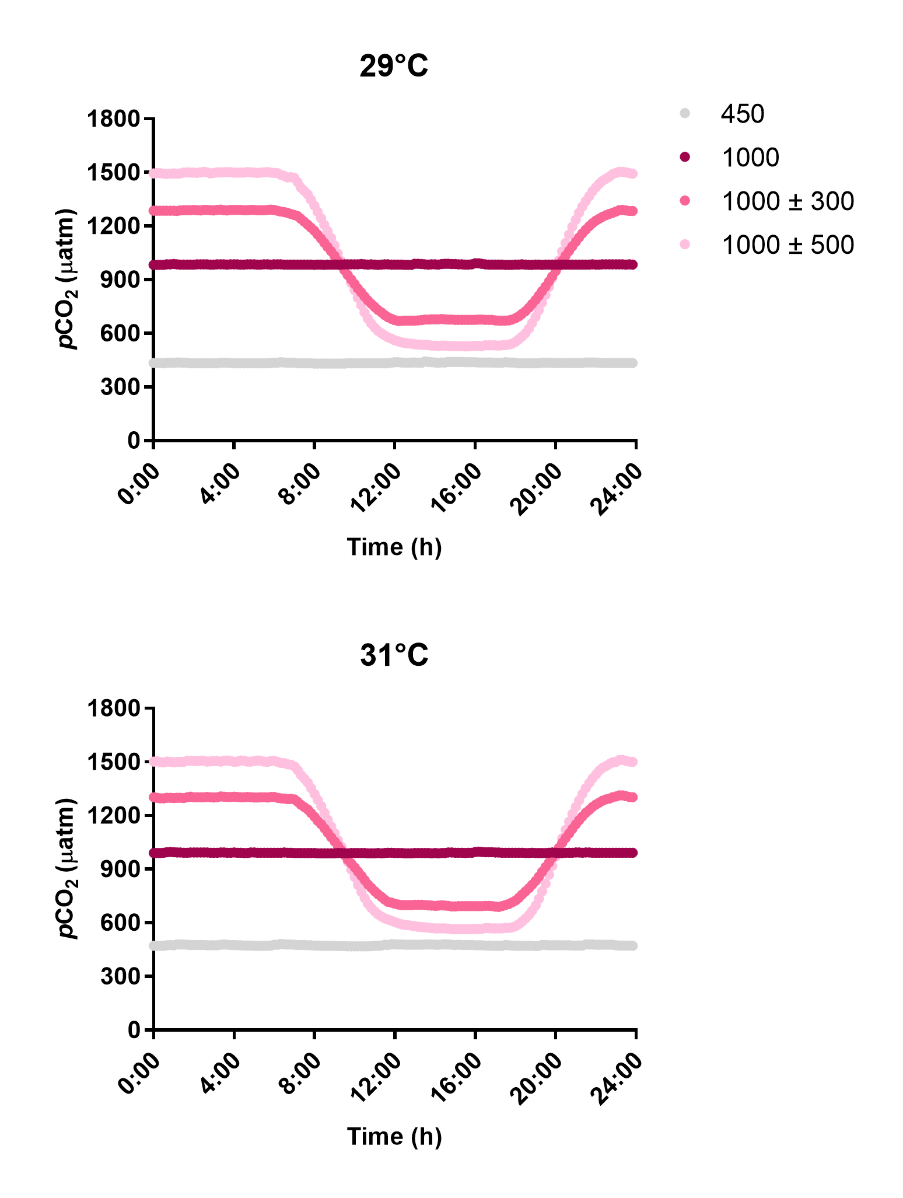


**Supplementary Figure 1.** Mean daily *p*CO2 profiles at 29 and 31°C.


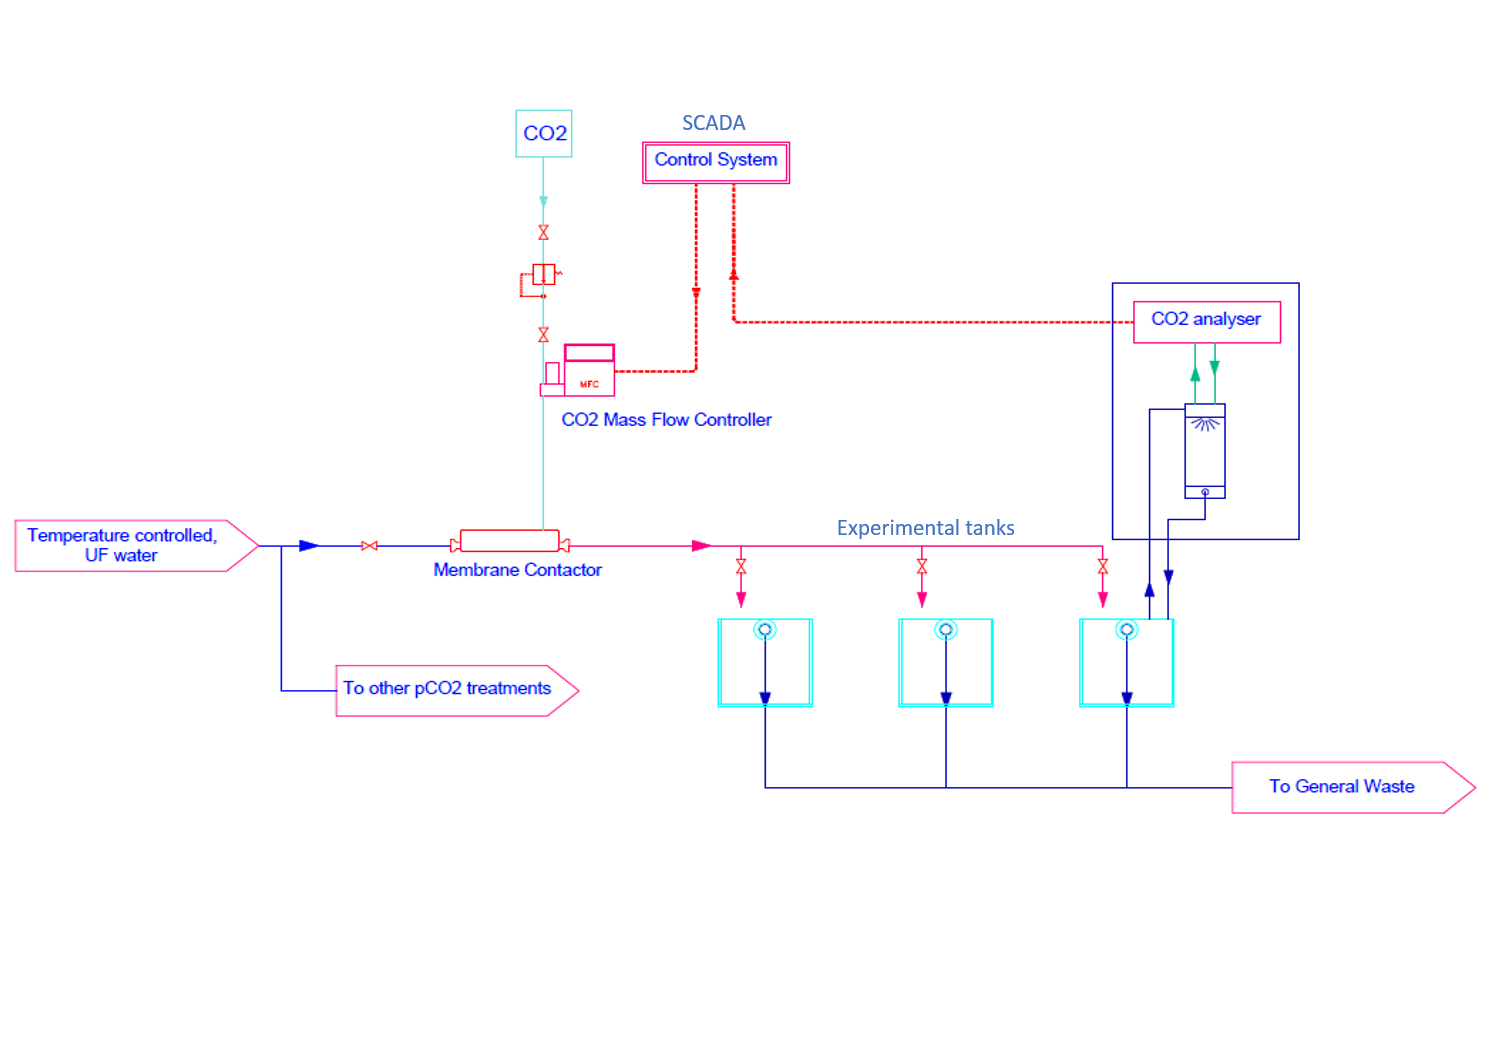


**Supplementary Figure 2.** Schematic diagram of one individual system. The experimental setup was comprised of 16 systems.

**Supplementary Table 1.** Comparison between the present study and two previous studies (Jarrold et al., 2017; Jarrold and Munday, 2018) of the effects that stable elevated, diel-cycling elevated CO2 and elevated temperature had on the survival, growth and behaviour of the spiny damselfish, *Acanthochromis polyacanthus*. *NA* is used to show that a trait was not measured in a study. – represents no significant effects or apparent response. Arrows represent the direction of a response, while the colours represent the following: Red = significant negative effect; Green = significant positive effect and orange represents a non-significant trend. The responses of traits to stable-elevated CO2 are relative to the control treatment, while the responses to diel-cycling elevated CO2 are relative to stable elevated CO2.

|  | Jarrold et al., 2017 | | Jarrold and Munday 2018 | | Present study | | |
| --- | --- | --- | --- | --- | --- | --- | --- |
| Trait | Stable-elevated CO2 | Diel cycling-elevated CO2 | Stable-elevated CO2 | Diel cycling-elevated CO2 | Stable-elevated CO2 | Diel cycling-elevated CO2 | Elevated temperature |
| Survival | *NA* | *NA* | − | − | − | − | ↓ |
| Growth | *NA* | *NA* | ↓ | ↑ | ↓ | ↑ | ↓ |
| Absolute lateralization | ↓ | ↑ | *NA* | *NA* | ↓ | ↑ | − |
| Relative lateralization | − | − | *NA* | *NA* | − | − | − |
| Routine activity | *NA* | *NA* | *NA* | *NA* | − | ↓ | ↓ |
| Boldness | *NA* | *NA* | *NA* | *NA* | − | − | ↓ |
| Fast starts | *NA* | *NA* | *NA* | *NA* | − | − | ↑ |

References

Jarrold, M. D., Humphrey, C., McCormick, M. I., and Munday, P. L. (2017). Diel CO2 cycles reduce severity of behavioural abnormalities in coral reef fish under ocean acidification. *Sci. Rep.* 7, 10153. doi:10.1038/s41598-017-10378-y.

Jarrold, M. D., and Munday, P. L. (2018). Diel CO2 cycles do not modify juvenile growth, survival and otolith development in two coral reef fish under ocean acidification. *Mar. Biol.* 165. doi:10.1007/s00227-018-3311-5.
